# Supplementary material for: Comparative Study on Alternative Splicing in Human Fungal Pathogens Suggests Its Involvement During Host Invasion
Source: Front Microbiol. 2018 Oct 2;9:2313. doi: 10.3389/fmicb.2018.02313 (PMC6176087; doi:10.3389/fmicb.2018.02313)
Supplement: Supplementary file 2 [file Data_Sheet_2.CSV]

Species	DNA_sequence	Source DNA_sequence	Gene_annotation	Source Gene_annotation	Feature_annotation	Source Feature_annotation	Spliceosomal gene number	Protein_sequence	Source Protein_sequence
Candia albicans	A22-s05-m05-r11_chromosomes	www.candidagenome.org/	A22-s07-m01-r52_features	http://www.candidagenome.org/	A22-s07-m01-r51_chromosomal_feature.tab	http://www.candidagenome.org/ (Feburary 26, 2018)	84	C_albicans_SC5314_version_A22-s07-m01-r44_default_protein.fasta	http://www.candidagenome.org/ (January 12, 2018)
Candida glabrata	s02-m05-r02_chromosomes	www.candidagenome.org/	Linde et al 2015	From Linde et al 2015 based on http://www.candidagenome.org/	s02-m07-r22_chromosomal_feature.tab	http://www.candidagenome.org/ (Feburary 26, 2018)	108	C_glabrata_CBS138_version_s02-m07-r19_orf_coding	http://www.candidagenome.org/ (January 12, 2018)
Candida parapsilois	s01-m03-r13_chromosomes	www.candidagenome.org/	s01-m03-r13_features	http://www.candidagenome.org/	s01-m03-r24_chromosomal_feature.tab	http://www.candidagenome.org/ (Feburary 26, 2018)	99	C_parapsilosis_CDC317_version_s01-m03-r23_orf_coding	http://www.candidagenome.org/ (January 12, 2018)
Histoplasma capsulatum	G217B_2017-09-11	http://histo.ucsf.edu/downloads/	G217B_2017-09-11.transcripts	http://histo.ucsf.edu/downloads/	g186ar.ASM15011v1.38.nonchromosomal.dat	ftp://ftp.ensemblgenomes.org/pub/release-38/fungi/embl/fungi_ascomycota1_collection/histoplasma_capsulatum_g186ar/ (February 26, 2018)	0	Histoplasma_capsulatumG217B.GSCpredictedgeneset2015.fasta	http://histo.ucsf.edu/downloads/ (January 12, 2018)
Aspergillus fumigatus	a1163.CADRE.31.dna.toplevel	http://fungi.ensembl.org	a1163.CADRE.31	http://fungi.ensembl.org	a1163.CADRE.38.nonchromosomal.dat	ftp: //ftp.ensemblgenomes.org/pub/release-38/fungi/embl/aspergillus_fumigatusa1163/ (February 26, 2018)	44	Aspergillus_fumigatusa1163.CADRE.pep.all.fasta	ftp://ftp.ensemblgenomes.org/pub/release-39/fungi/fasta/aspergillus_fumigatusa1163/pep/ (January 12, 2018)
Lichtheimia corymbifera	Lichtheimia_corymbifera_v1.genome	www.genome-resource.de/download/lcorymbifera/	Lichtheimia_corymbifera_v1	www.genome-resource.de/download/lcorymbifera/	jmrc_fsu_9682.454Minimus.38.nonchromosomal.dat	ftp://ftp.ensemblgenomes.org/pub/release-38/fungi/embl/fungi_mucoromycota1_collection/lichtheimia_corymbifera_jmrc_fsu_9682/ (February 26, 2018)	39	Lichtheimia_corymbifera_v1.protein.fasta	http://www.genome-resource.de/html/lcorymbifera/lcorymbifera.html (January 12, 2018)
Cryptococcus neoformans	var_grubii_h99.CNA3.dna.chromosome	http://fungi.ensembl.org	var_grubii_h99.CNA3.36	http://fungi.ensembl.org	var_grubii_h99.CNA3.38.chromosome.*.dat	ftp://ftp.ensemblgenomes.org/pub/release-38/fungi/embl/fungi_basidiomycota1_collection/cryptococcus_neoformans_var_grubii_h99/ (February 26, 2018)	42	Cryptococcus_neoformans_var_grubii_h99.CNA3.pep.all.fasta	ftp://ftp.ensemblgenomes.org/pub/release-39/fungi/fasta/fungi_basidiomycota1_collection/cryptococcus_neoformans_var_grubii_h99/pep/ (January 12, 2018)
